# Supplementary material
Source: PubMed Central journal article supplement (PMC5055304)
Supplement: NIHMS818829-supplement-supplemental.pdf [file NIHMS818829-supplement-supplemental.pdf]

**Supplementary information**

**INHIBITION OF INFLAMMATORY AND NEUROPATHIC PAIN THROUGH TARGETING OF MOR-CCR<sub>5</sub> HETEROMERS**

**Eyup Akgün,<sup>\*†</sup> Muhammad I. Javed,<sup>†</sup> Mary M. Lunzer,<sup>†</sup> Mike D. Powers,<sup>†</sup> Yuk Sham,<sup>‡</sup> Yoshikazu Watanabe<sup>†</sup> and Philip S. Portoghese.<sup>\*†</sup>**

<sup>†</sup>Department of Medicinal Chemistry and <sup>‡</sup>Center for Drug Design, University of Minnesota, Minneapolis, MN 55455.

**Contents:**

Title, affiliation and **Supplementary Figure 1.** Model of TM1-TM2-H8 and TM5-TM6 interfaced MOR -CCR<sub>5</sub> heteromer

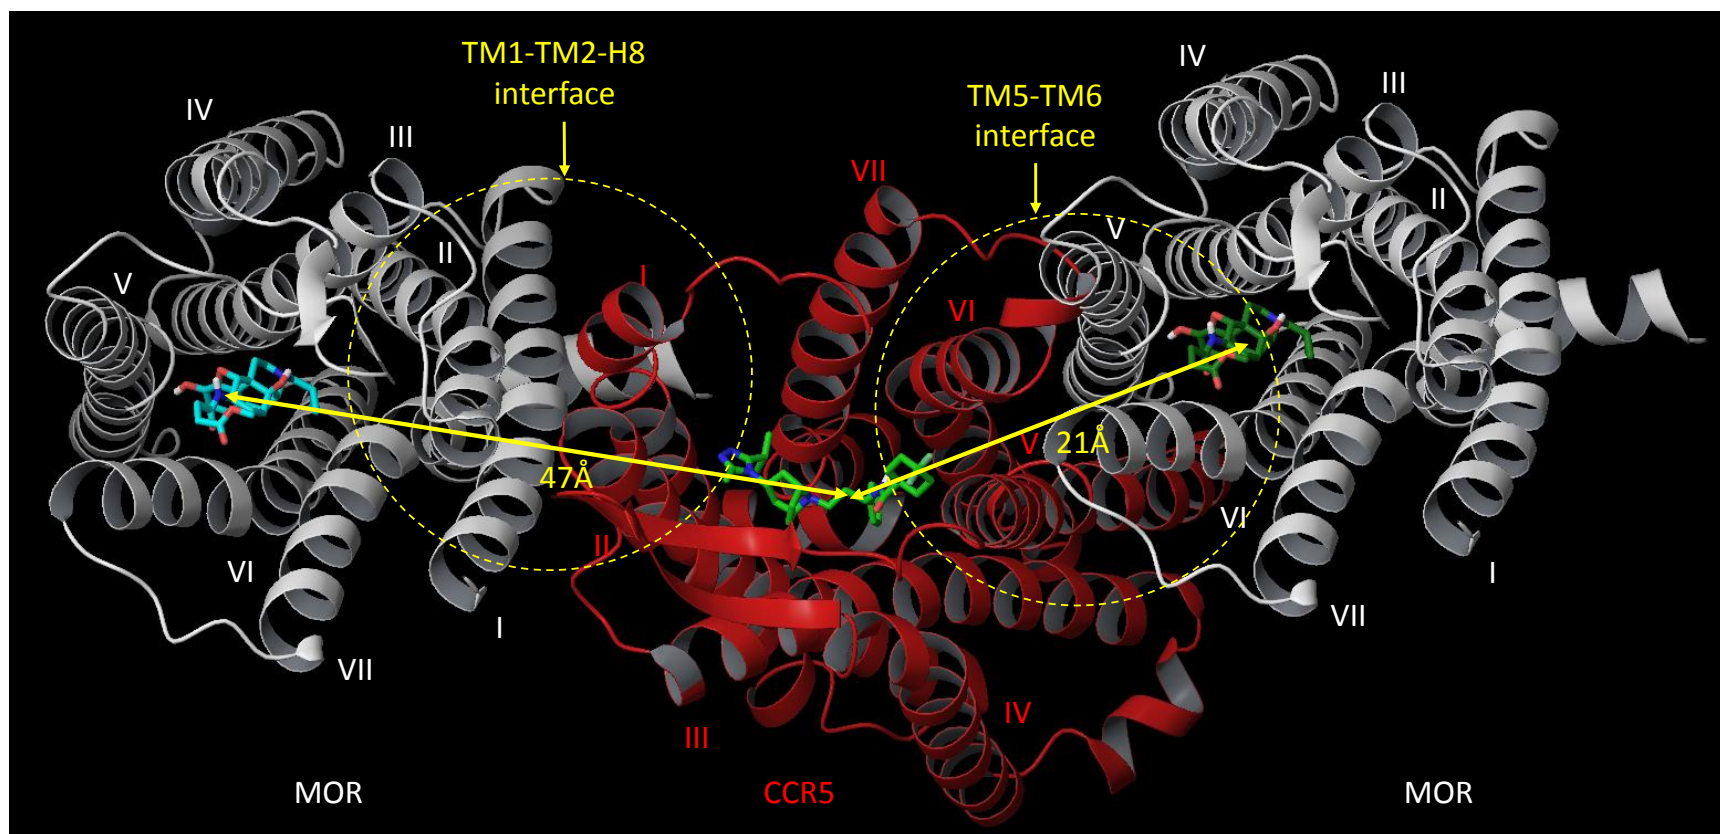

**Supplementary Figure 1.** Model of TM1-TM2-H8 and TM5-TM6 interfaced CCR<sub>5</sub>-MOR heteromer.
